# Supplementary material for: Sequence-based Analysis of Zonula Occludens Toxins Identified by Comparative Genomics in Non-Toxigenic Vibrio Parahaemolyticus Strains Isolated in Southern Chile
Source: Preprints.org preprint supplement (doi:10.20944/preprints201905.0105.v1), 2019-05-09

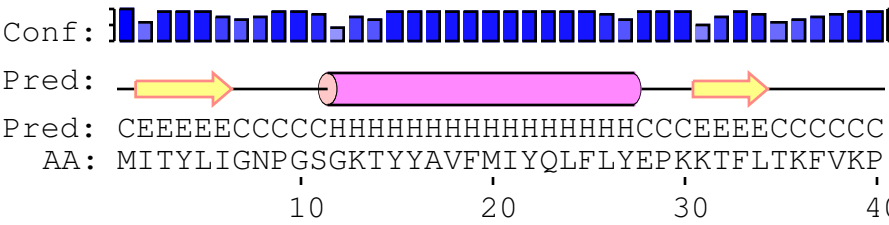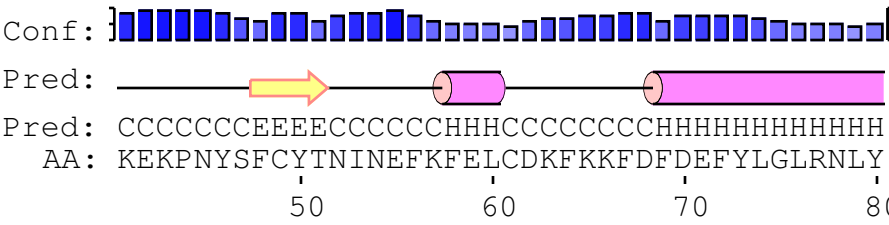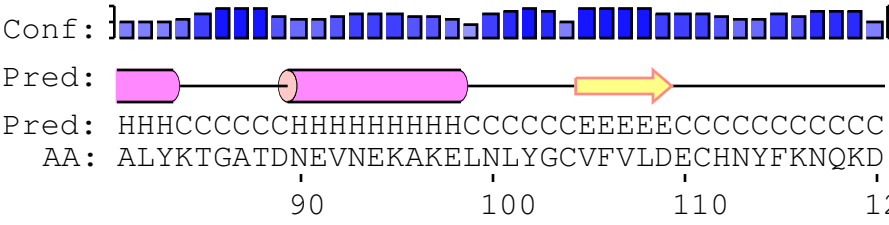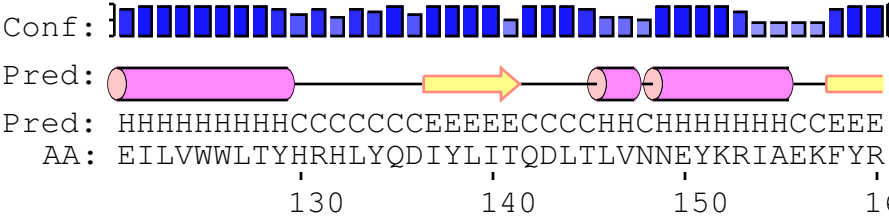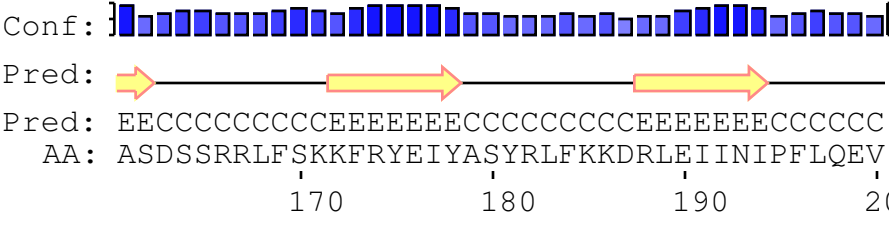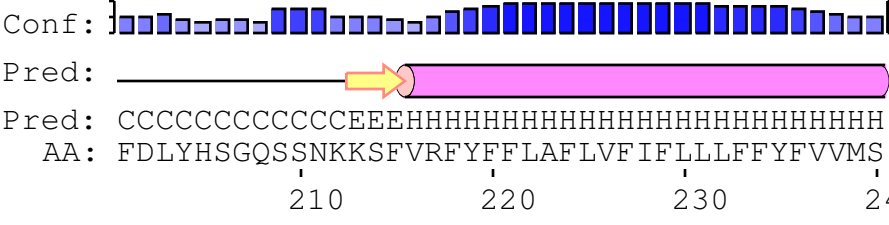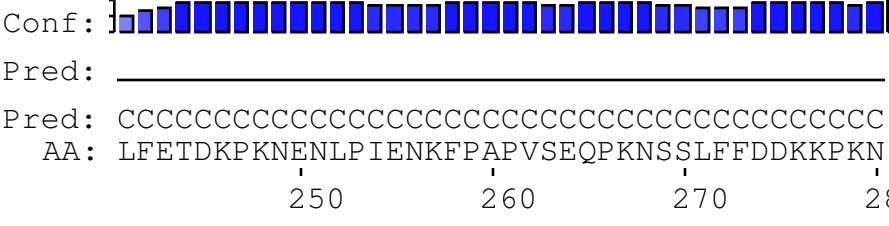

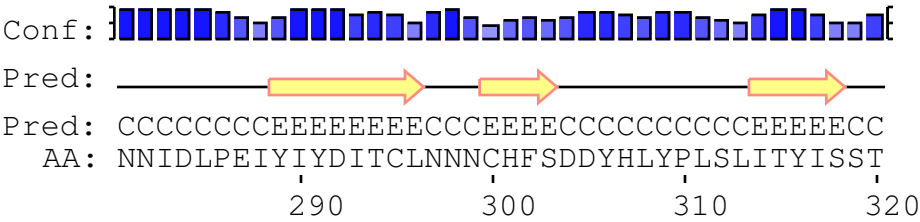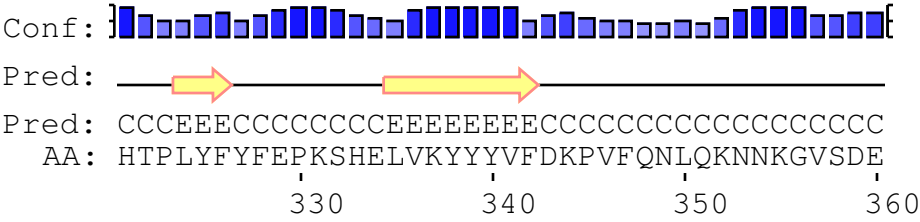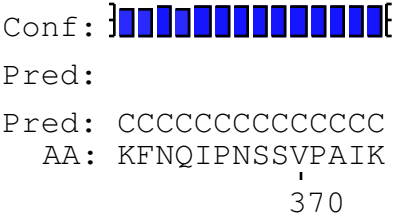

Legend:

 = helix

 = strand

 = coil

Conf:  = confidence of prediction

Pred:  = predicted secondary structure

AA:  = target sequence

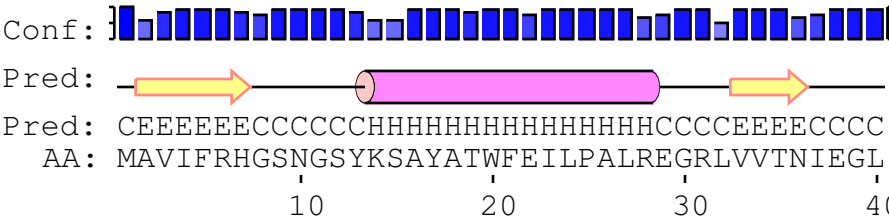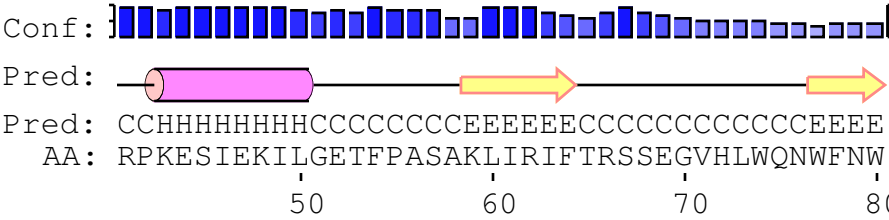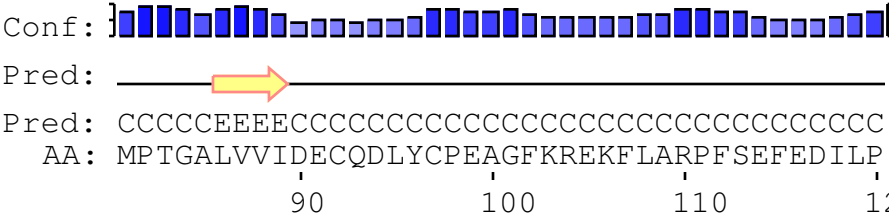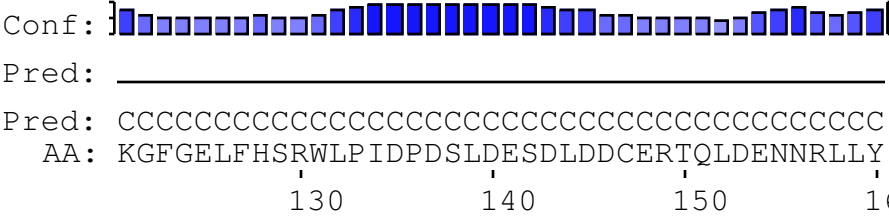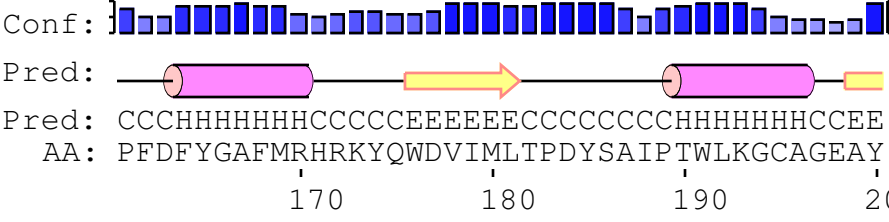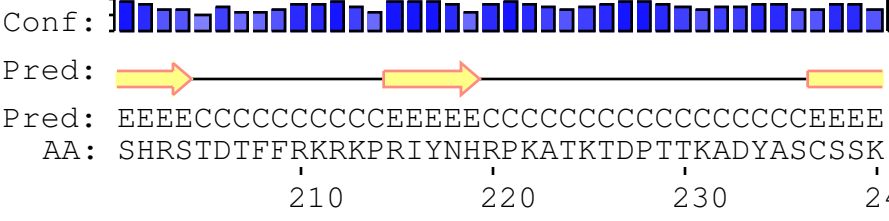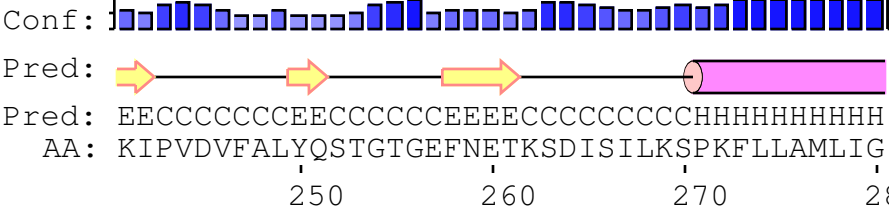

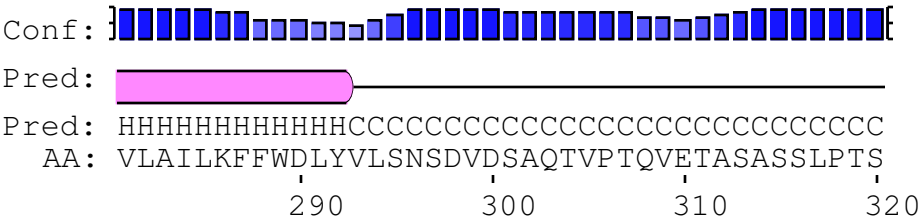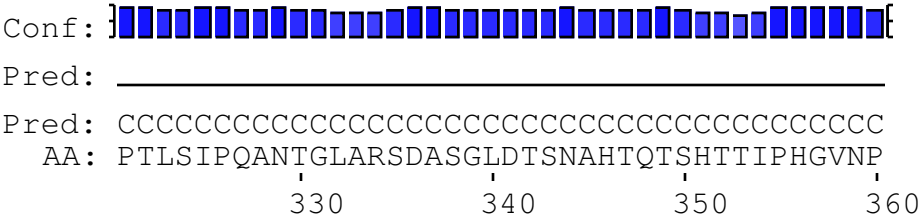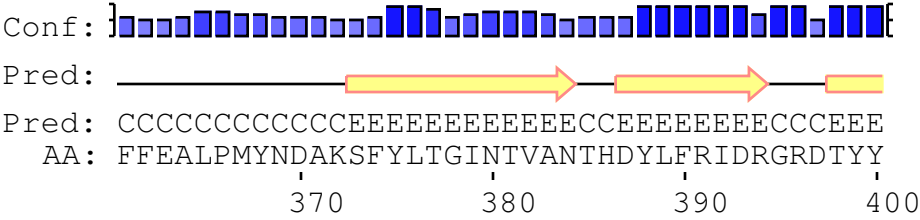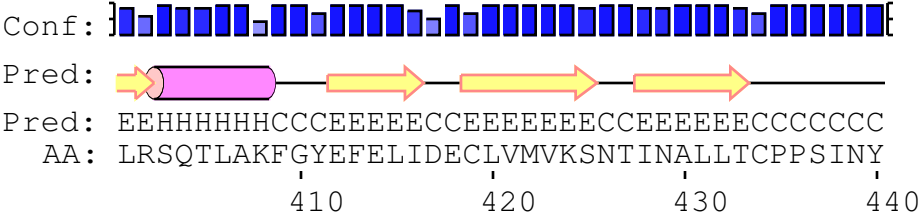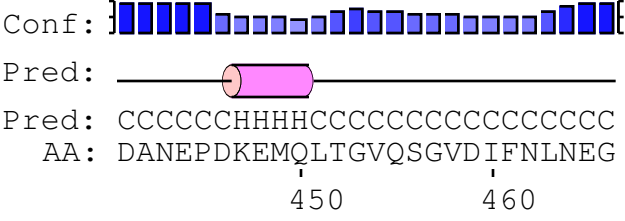

Legend:

 = helix

 = strand

 = coil

Conf:  = confidence of prediction

Pred:  = predicted secondary structure

AA:  = target sequence

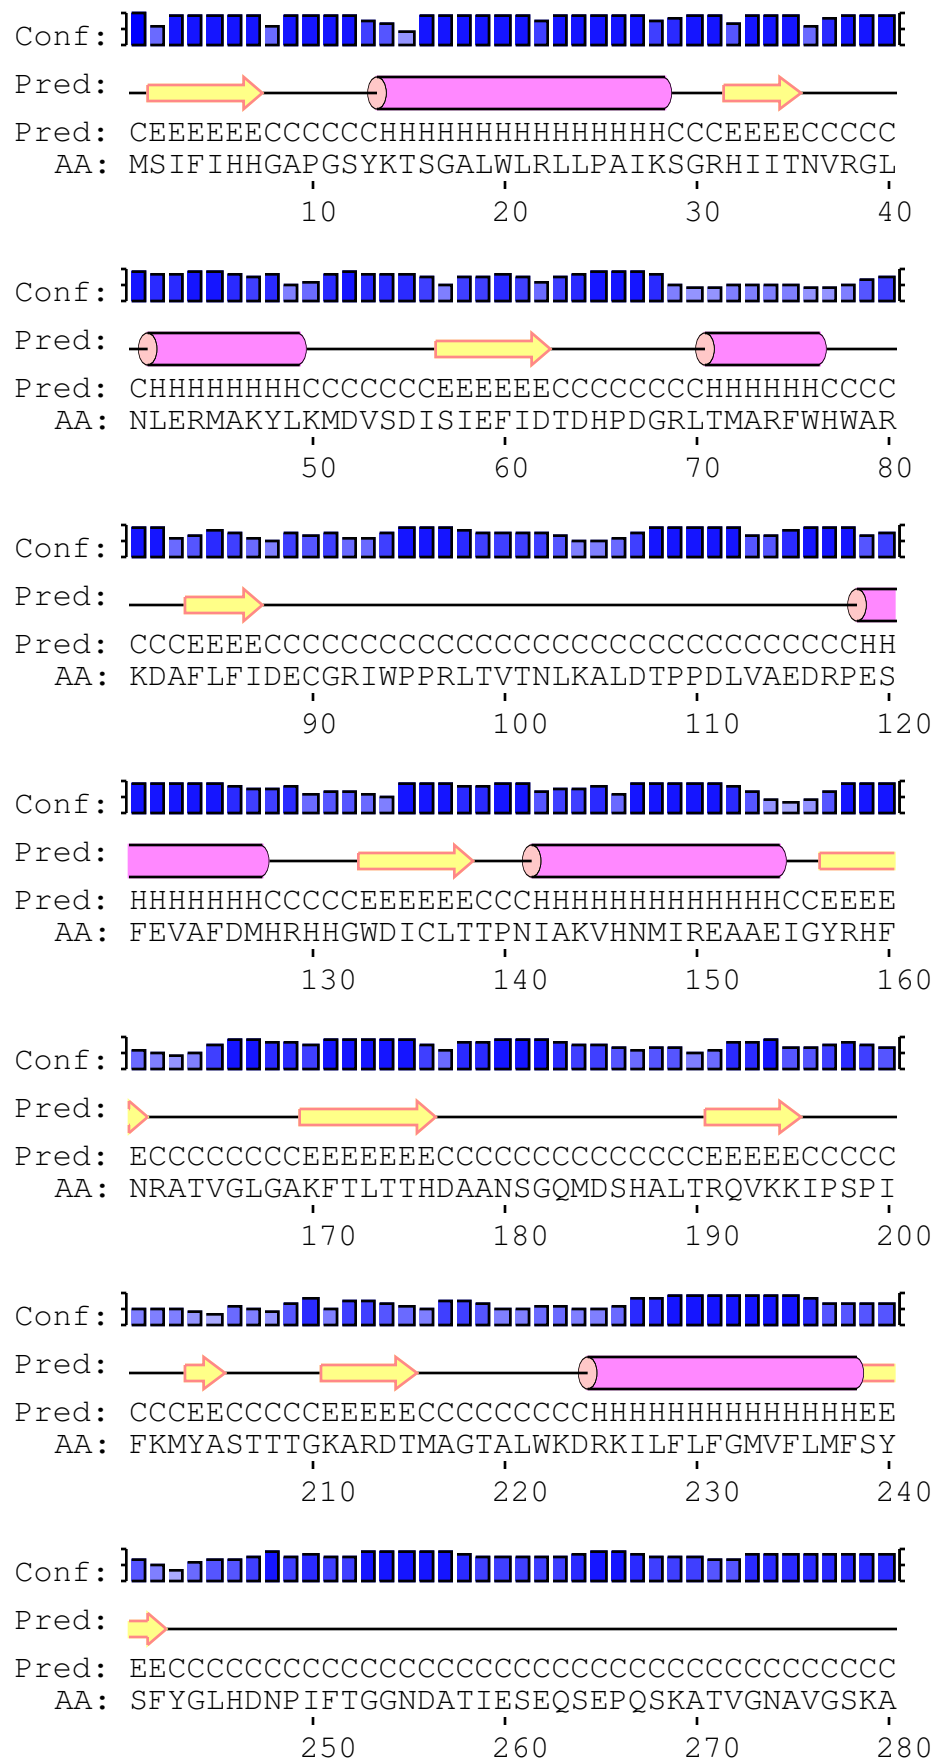

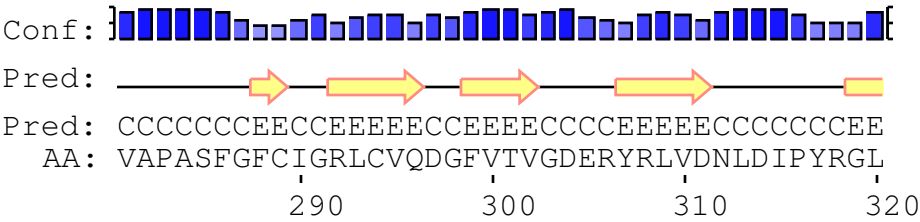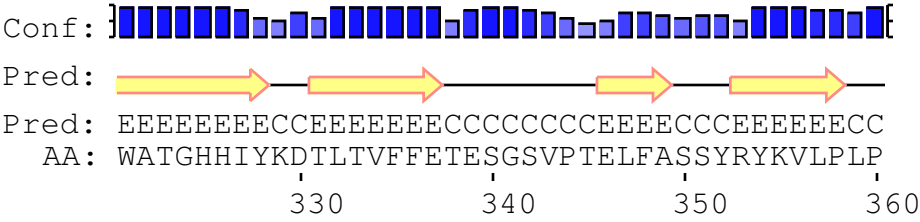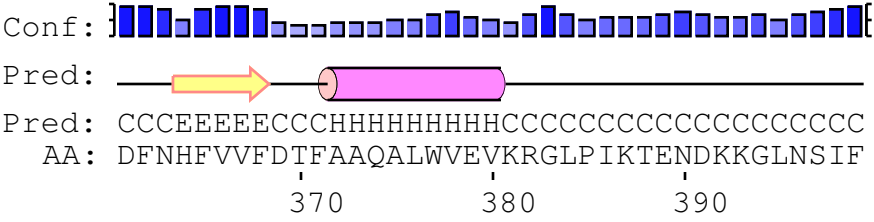

Supplement: Supplementary file 1 [file supplementary]
