# Supplementary material for: Sequence-based Analysis of Zonula Occludens Toxins Identified by Comparative Genomics in Non-Toxigenic Vibrio Parahaemolyticus Strains Isolated in Southern Chile
Source: Preprints.org preprint supplement (doi:10.20944/preprints201905.0105.v1), 2019-05-09
Supplement: Supplementary file 1 [file supplementary]

## Sheet: Hoja1
Vibrio specie	Strain	Source or Origin	Year isolation	Acession number(s)
V. parahaemolyticus	RIMD2210633	Clinical sample; Japan	1996	NC_004603/NC_004605.1
V. parahaemolyticus	PMA2.15	Mussels; Chile	2015	MKQT00000000.1
V. parahaemolyticus	0425-49	Clinical sample; Japan	2004	JYNG00000000.1
V. parahaemolyticus	3644	Human stool; USA	2007	AOPD00000000.1
V. parahaemolyticus	S097	Clinical sample; Japan	1992	AWJY00000000.1
V. parahaemolyticus	PMC53.7	Clinical sample; Chile	2007	MKQF00000000.1
V. parahaemolyticus	VP2007-007	Marine environmental sample; USA	2007	JALI00000000.1
V. parahaemolyticus	PMA3.15	Mussels; Chile	2015	MKQU00000000.1
Vibrio albensis	VL426	Marine environmental sample; Germany	Unknown	ACHV00000000.1
Vibrio antiquarius	EX25	Marine environmental sample; unknown	Unknown	CP001805.1/CP001806.1
Vibrio atlanticus	CECT 7223	Clams of Ruditapes philippinaru; Spain	Unknown	FLQP00000000.1
Vibrio campbellii	CAIM 519	Marine environmental sample; Hawaii	1971	CP015863.1/CP015864.1
Vibrio campbellii	UMTGB204	Malaysia; Unknown	2012	JSFE00000000.1
Vibrio campbellii	CAIM 519	Marine environmental sample; Hawaii	1971	CP015863.1/CP015864.1
Vibrio campbellii	HY01	Marine environmental sample; unknown	Unknown	AAWP00000000.1
Vibrio cholerae	4488	Unknown; India	2006	CWRU00000000.1
Vibrio cholerae	V51	Unknown; USA	1987	AAKI00000000.3
Vibrio cholerae	A217	Unknown; USA	1986	CWPV00000000.1
Vibrio cholerae	A219	Unknown; Georgia	1986	CWPQ00000000.1
Vibrio cholerae	RC27	Unknown; Indonesia	1991	ADAI00000000.1
Vibrio cholerae	ATCC 39541	Unknown	Unknown	CP000626/CP000627
Vibrio cholerae	V212-1	Unknown; India	1991	CWPH00000000.1
Vibrio cholerae	YN97083	Unknown; China	1997	LBBQ00000000.1
Vibrio cholerae	B33	Clinical sample; Mozambique	2004	AAWE00000000.1
Vibrio cholerae	MO10	Clinical sample; India	1992	AAKF00000000.3
Vibrio cholerae	RC9	Unknown; Kenya	1985	ACHX00000000.1
Vibrio cholerae	571	Clinical sample; China	1988	JIDO00000000.1
Vibrio cholerae	GP16	Unknown; India	1971	CWQE00000000.1
Vibrio cholerae	98-175	Clinical sample; India	1975	JIDM00000000.1
Vibrio cholerae	NHCC 081	Clinical sample; Bangladesh	2011	LGOA00000000.1
Vibrio cholerae	PLR64	Clinical sample; Bangladesh	2011	LGNJ00000000.1
Vibrio cholerae	PLR5	Clinical sample; Bangladesh	2011	LGNK00000000.1
Vibrio cholerae	7686	Unknown; Kenya	2009	CWRH00000000.1
Vibrio cholerae	IDHO1_726	Unknown; India	2009	CWQN00000000.1
Vibrio cholerae	2011V-1021	Clinical sample; Haiti	2011	AHGK00000000.1
Vibrio europeus	PP-638	Oyster; Spain	2001	LUAX00000000.1
Vibrio fischeri	ATCC 700601	Unknown	Unknown	CP000020.2/CP000021.2
Vibrio ichthyoenteri	ATCC 700023	Healthy marine sponge; Japan	1995	AFWF00000000.1
Vibrio lentus	5F79	Marine environmental sample; USA	2006	MAKA00000000.1
Vibrio maritimus	JCM 19240	Marine water sample; unknown	Unknown	BBMT00000000.1
Vibrio mediterranei	50	Sediment; Spain	Unknown	FLLQ00000000.1
Vibrio mimicus	VM573	Unknown	Unknown	ACYV00000000.1
Vibrio mimicus	523-80	Clinical sample; USA	1980	JIDP00000000.1
Vibrio sagamiensis	NBRC 104589	Marine environmental sample; Japan	Unknown	BAOJ00000000.1
Vibrio scophthalmi	LMG 19158	Marine sponge Scleritoderma cyanea; Spain	Unknown	AFWE00000000.1
Vibrio sinaloensis	T08	Marine environmental sample; Malasya	2004	JRWP00000000.1
Vibrio sp	JCM 19053	Unknown; Japan	Unknown	BAXK00000000.1
Vibrio sp	HENC-01	Marine environmental sample; Haiti	2010	AJSQ00000000.1
Vibrio sp	JCM 19052	Unknown; Japan	Unknown	BAXJ00000000.1
Vibrio sp	JCM 18095	Unknown	Unknown	BBDZ00000000.1
Vibrio sp	HI00D65	Marine environmental sample; Hawaii	2013	LWEH00000000.1
Vibrio sp	RC586	Marine environmental sample; USA	1999	ADBD00000000.1
Vibrio sp	J237	Unknown; France	Unknown	CCKP00000000.1
Vibrio sp	HI00D65	Marine environmental sample; Hawaii	2013	LWEH00000000.1
Vibrio sp	ER1A	Elysia rufescens; USA	2005	JPJA00000000.1
Vibrio sp	JCM AND4	Marine environmental sample; Thailand	Unknown	ABGR00000000.1
Vibrio splendidus	10N.261.55.E2	Marine environmental sample; USA	2013	Not avaialable
Vibrio splendidus	1-F155	Marine environmental sample; USA	2006	AJZJ00000000.2
Vibrio splendidus	12-E03	Marine environmental sample; USA	2003	AJZD00000000.2
Vibrio splendidus	ATCC 33789	Marine environmental sample; Hawaii	Unknown	AFWG00000000.1
Vibrio tasmaniensis	1F-267	filtered seawater; USA: Massachusetts	2006	AJZO00000000.2
